# Supplementary material for: Strongly bound Wannier–Mott exciton in pristine (LaO)MnAs and origin of ferrimagnetism in F-doped (LaO)MnAs
Source: Royal Society of Chemistry journal article supplement (doi:10.1039/d3ra01506h), 2023-01-01
Supplement: d3ra01506h1.pdf [file d3ra01506h1.pdf]

## Electronic Supplementary Information

### **Strongly-bound Wannier-Mott Exciton in Pristine (LaO)MnAs and Origin of Ferrimagnetism in F-doped (LaO)MnAs**

Jessie Manopo<sup>a, b</sup>, Tio Prince Lubis<sup>a, b</sup>, Muhammad Arief Mustajab Enha Maryono<sup>b</sup>, Pepen Arifin<sup>b</sup>, Toto Winata<sup>b</sup>, Rena Widita<sup>c</sup>, and Yudi Darma<sup>a, b†</sup>

<sup>a</sup>Quantum Semiconductor and Devices Lab., Department of Physics, Faculty of Mathematics and Natural Sciences, Bandung Institute of Technology, Jalan Ganesha 10 Bandung, 40132, Indonesia.

<sup>b</sup>Physics of Electronic Materials Research Division, Department of Physics, Faculty of Mathematics and Natural Sciences, Bandung Institute of Technology, Jalan Ganesha 10 Bandung, 40132, Indonesia.

<sup>c</sup>Nuclear Physics and Biophysics Research Division, Department of Physics, Faculty of Mathematics and Natural Sciences, Bandung Institute of Technology, Jalan Ganesha 10 Bandung, 40132, Indonesia

**Table S1.** Bond lengths and angles of MnAs<sub>4</sub> tetrahedra in pristine and doped (LaO)MnAs

|          | $\alpha$ | $\beta$ | p (Å)  | q (Å)  | r (Å)  | s (Å)  | $\gamma$         | Illustration                                                                        |
|----------|----------|---------|--------|--------|--------|--------|------------------|-------------------------------------------------------------------------------------|
| pristine | 106.962  | 110.74  | 2.5592 | 2.5592 | 2.5592 | 2.5592 | 106.962          | 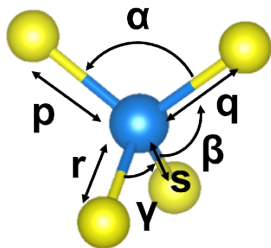 |
| 6.25%    | 106.54   | 110.815 | 2.5612 | 2.5612 | 2.5696 | 2.5696 | 107.088          |                                                                                     |
|          | 106.957  | 110.702 | 2.5559 | 2.5586 | 2.5641 | 2.5652 | 106.514          |                                                                                     |
| 12.50%   | 106.53   | 111.124 | 2.5618 | 2.5627 | 2.5627 | 2.5618 | 106.53           |                                                                                     |
|          | 105.787  | 111.344 | 2.5594 | 2.5594 | 2.5594 | 2.5594 | 105.787          |                                                                                     |
| 25%      | 106.935  | 111.362 | 2.5445 | 2.5445 | 2.5850 | 2.5850 | 104.544<br>(Mn2) |                                                                                     |
|          | 106.444  | 111.369 | 2.5526 | 2.5526 | 2.5767 | 2.5767 | 105.024<br>(Mn1) |                                                                                     |

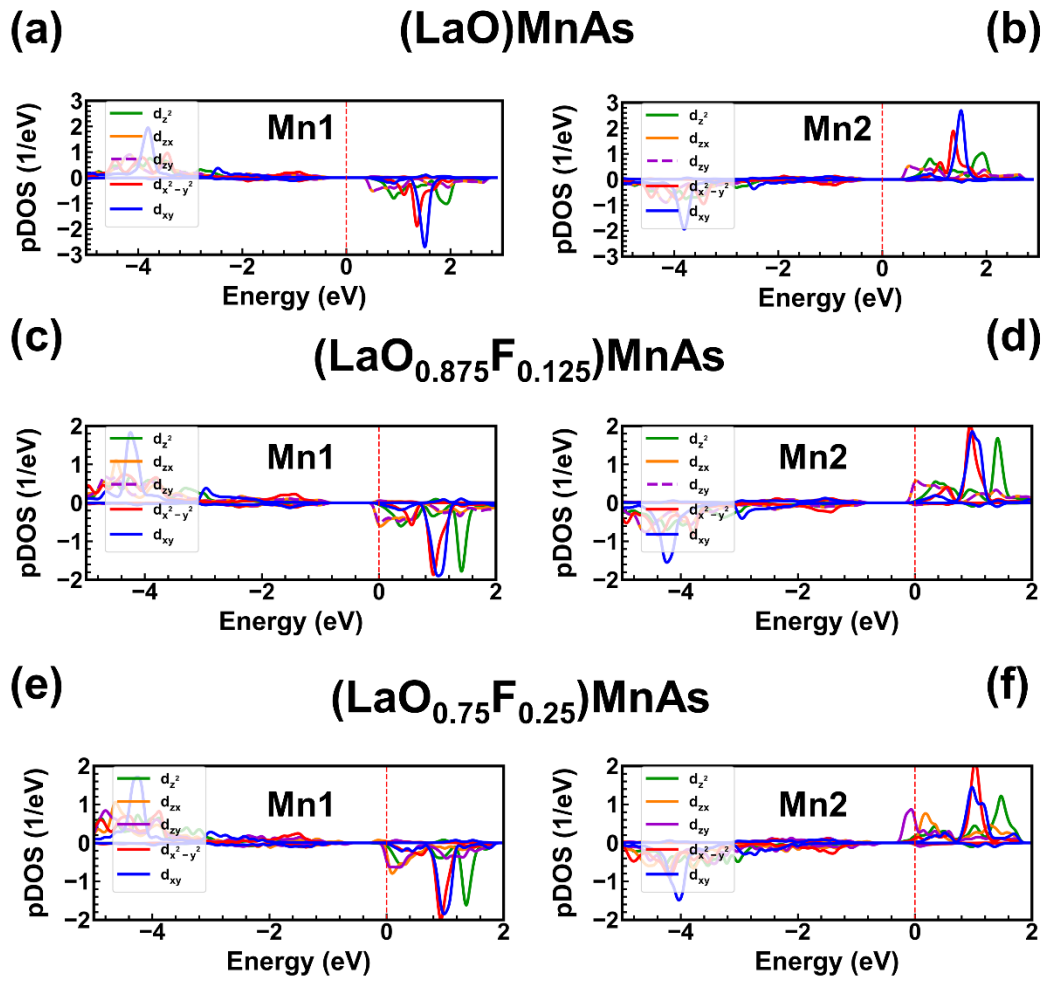

**Figure S1.** Calculated projected density of states for (a) Mn1 and (b) Mn2 d orbital of pristine (LaO)MnAs, (c) Mn1 and (d) Mn2 d orbital of (LaO<sub>0.875</sub>F<sub>0.125</sub>)MnAs, (e) Mn1 and (f) Mn2 d orbital of (LaO<sub>0.75</sub>F<sub>0.25</sub>)MnAs.

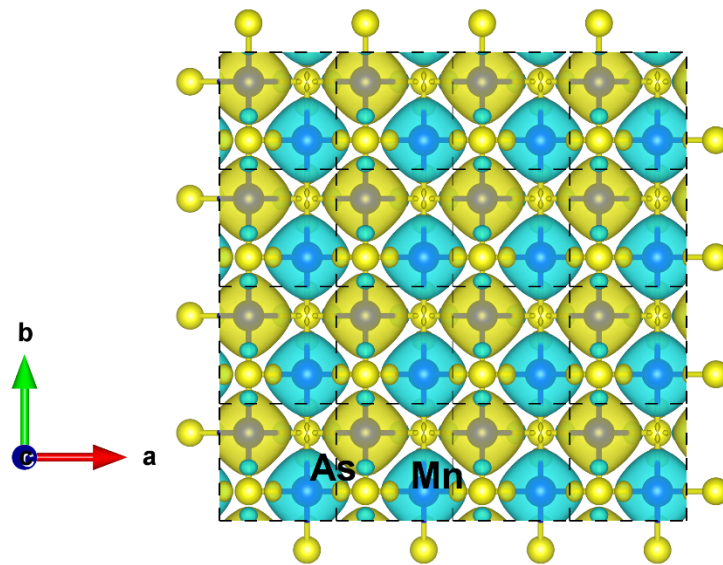

**Figure S2.** Calculated spin charge density of (MnAs) layer of (LaO<sub>0.75</sub>F<sub>0.25</sub>)MnAs with isosurface level of 0.003 eV/Å, where yellow and blue isosurfaces denote spin up and down respectively.

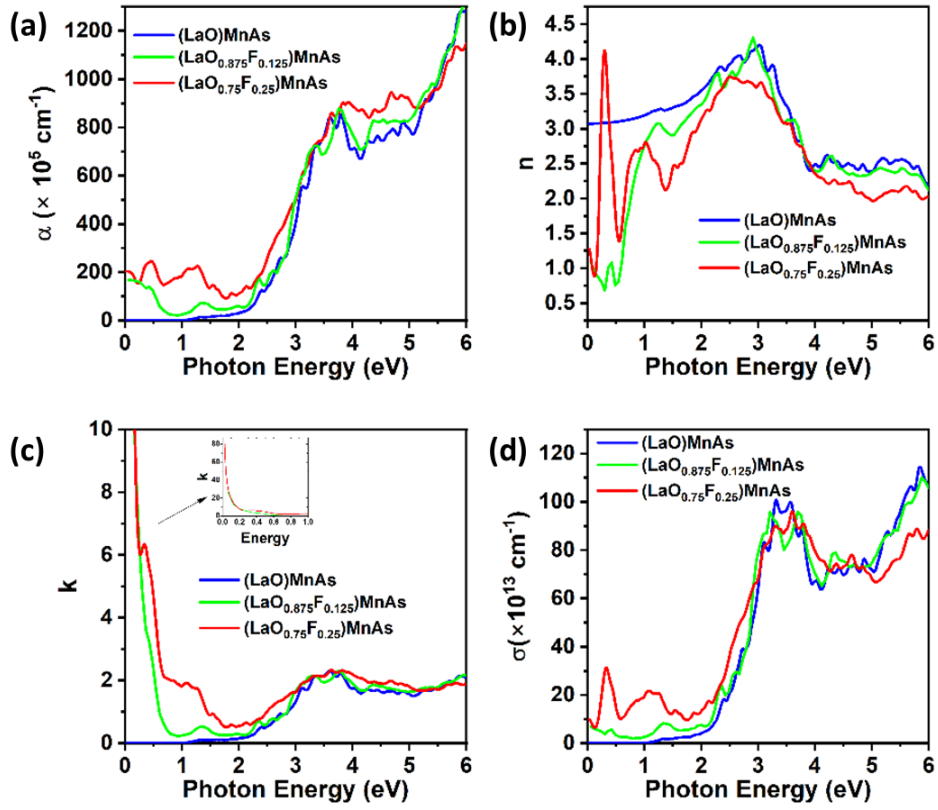

**Figure S3.** Calculated (a) absorption coefficient, (b) refractive index, (c) extinction coefficient, and (d) optical conductivity of pristine (LaO)MnAs, (LaO<sub>0.875</sub>F<sub>0.125</sub>)MnAs, and (LaO<sub>0.75</sub>F<sub>0.25</sub>)MnAs.

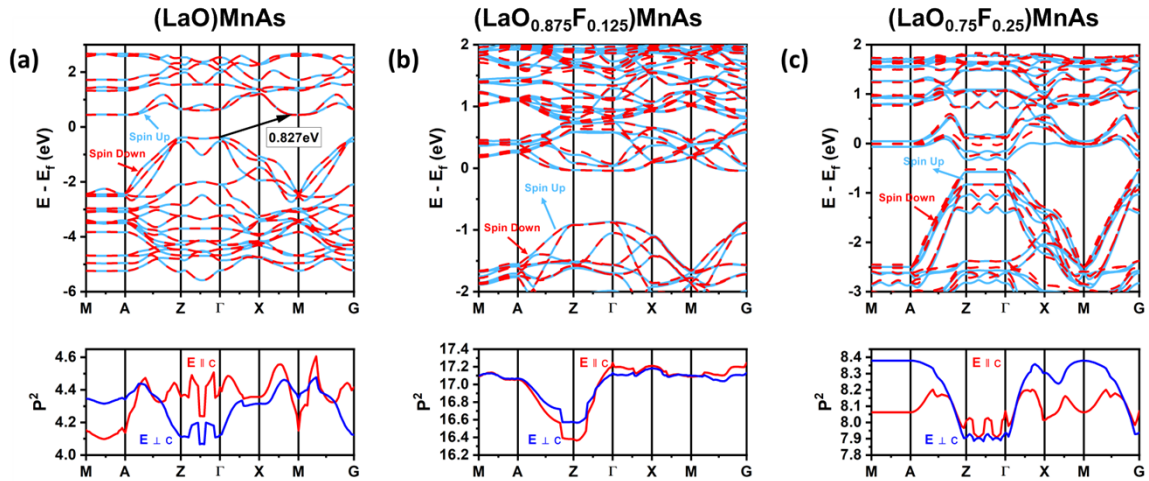

**Figure S4.** Momentum matrix elements of (a) pristine (LaO)MnAs, (b) (LaO<sub>0.875</sub>F<sub>0.125</sub>)MnAs, (c) and (LaO<sub>0.75</sub>F<sub>0.25</sub>)MnAs.
